# Supplementary material for: Potential Antimetastatic Effect of Timosaponin AIII against Human Osteosarcoma Cells through Regulating the Integrin/FAK/Cofilin Axis
Source: MDPI journal article supplement (doi:10.3390/ph14030260), 2021-03-14
Supplement: s1 [file s1]

# Potential antimetastatic effect of Timosaponin AIII against human osteosarcoma cells through regulating the Integrin/FAK/cofilin axis

Yi-Hsien Hsieh <sup>1,2,†</sup>, Wen-Hung Hsu <sup>3,†</sup>, Shun-Fa Yang <sup>1,2</sup>, Chung-Jung Liu <sup>3</sup>, Ko-Hsiu Lu <sup>4,5</sup>, Pei-Han Wang <sup>1</sup> and Renn-Chia Lin <sup>4,5,\*</sup>

## Supplementary Figure 1

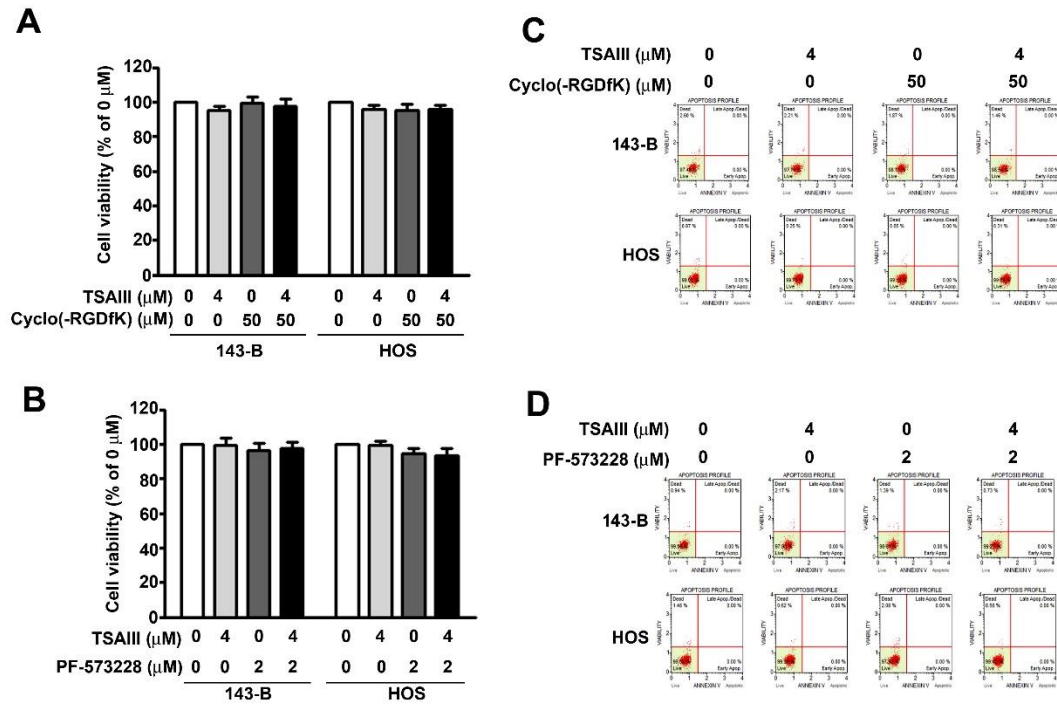

**Figure S1:** Synergistically inhibitory effect of TSAIII and Cyclo or PF on cell viability and cell death of human osteosarcoma cells. (A, B) 143-B and HOS cells were treated to TSAIII (0 and 4 μM) and/or Cyclo (0 and 50 μM) and PF (0 and 2 μM) for 24 h, and cell viability was measured using the CCK8 assay. (C.D) Cell death in human 143-B and HOS osteosarcoma cells were detected using Annexin V/PI staining by flow cytometry. Cyclo denotes Cyclo(RGDyK); PF denotes PF-573228.
